# Supplementary material
Source: HighWire-hosted journal article supplement (https://jitc.bmj.com/content/7/1/199)

# Supplementary Figure 1.

**a**

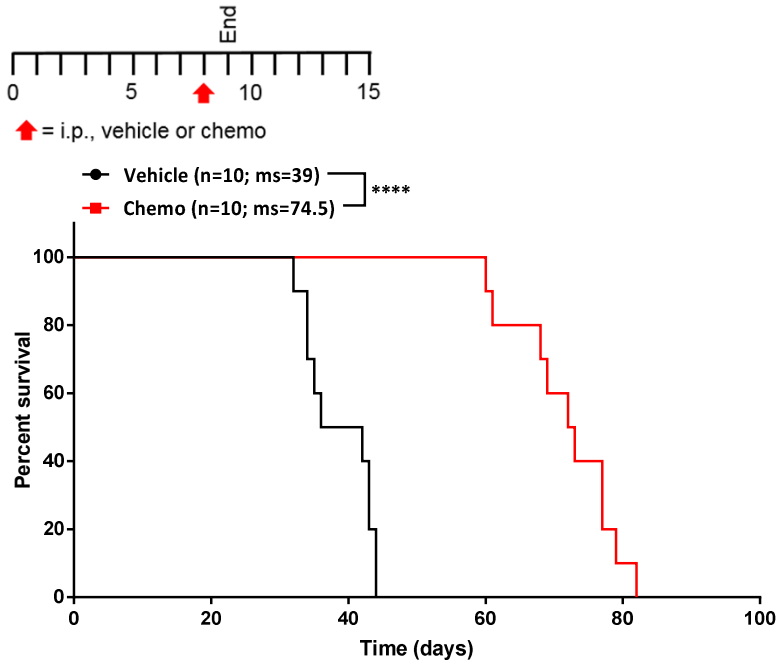

**b**

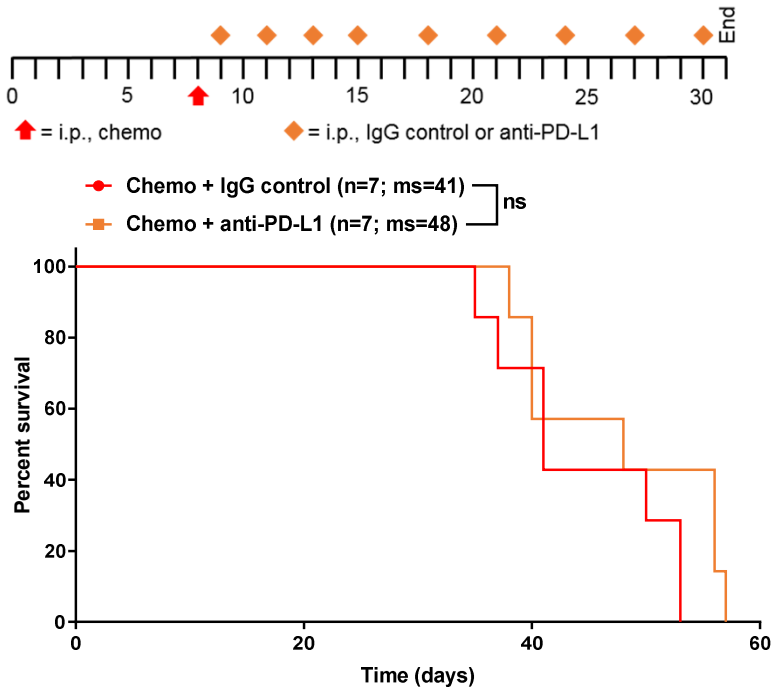

Supplement: media-1 [file media-1.pdf]
