# Supplementary material
Source: HighWire-hosted journal article supplement (https://jitc.bmj.com/content/7/1/199)

Supplementary Figure 11.

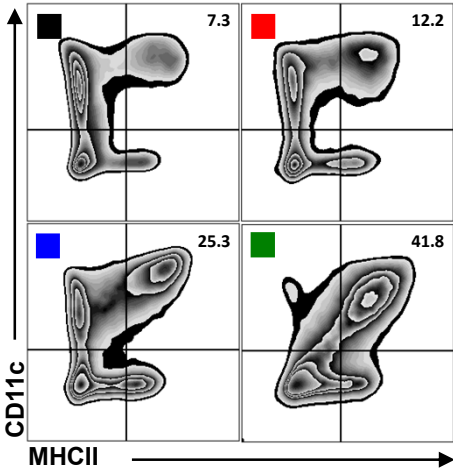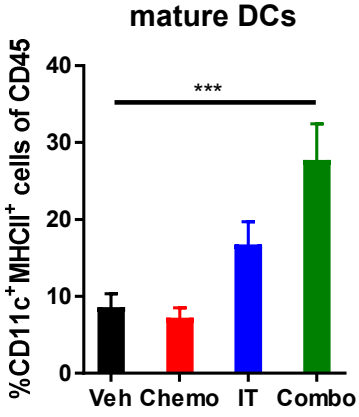

Supplement: media-11 [file media-11.pdf]
